# Supplementary material for: Effectiveness of combined vaginal progesterone and cervical cerclage in preventing preterm birth: a systematic review and meta-analysis protocol
Source: HighWire-hosted journal article supplement (doi:10.1136/bmjopen-2021-050086), 2021-06-01
Supplement: bmjopen-2021-050086supp001_data_supplement.pdf [file bmjopen-2021-050086supp001_data_supplement.pdf]

### **Appendix 1 – Search Strategy**

1. Cervical OR Cervix OR Rescue
2. Stitch\* OR cerclage OR Suture
3. 1 AND 2
4. Progesterone OR progestin OR prometrium OR progest
5. 3 AND 4

For PubMed and Cochrane where MeSH headings are available the term "Cerclage, Cervical"[Mesh] will be added.
